# Supplementary material for: Metagenomic Research of Infectious Diseases in Archaeological Contexts: Evidence from the Hospital Real de Todos-os-Santos (Portugal)
Source: MDPI journal article supplement (doi:10.3390/app12126096), 2022-06-15
Supplement: s1 [file s1]

Archive with 2 entries (2 files):
- Sup_Table S1.xlsx
- Suplementary Figures.pdf
