# Supplementary material for: Metagenomic Research of Infectious Diseases in Archaeological Contexts: Evidence from the Hospital Real de Todos-os-Santos (Portugal)
Source: MDPI journal article supplement (doi:10.3390/app12126096), 2022-06-15
Supplement: s1 [file s1 › Sup_Table S1.xlsx]

## Sheet: AR5000b
Species	HRTS1310.1
Achromobacter sp.	0.0206725
Acinetobacter johnsonii	0.0137817
Actinomyces sp.	0.00689085
Actinophytocola sp.	0.661521
Adhaeribacter sp.	0.523705
Aeromicrobium sp.	0.0413451
Aeromonas billingiae	0.0413451
Agrobacterium tumefaciens	0.0137817
Aliihoeflea aestuarii	2.75634
Alistipes sp.	0.0413451
Alloprevotella sp.	0.0206725
Altererythrobacter sp.	0.24118
Alysiosphaera sp.	0.351433
Anaerosalibacter sp.	24.9587
Anaerotruncus sp.	0.00689085
Arthrobacter cereus	27.6943
Arthrobacter sp.	0.723539
Azospira sp.	0.585722
Bacillus coahuilensis	0.0413451
Bacillus sp.	0.0137817
Bacteroides ovatus	0.0206725
Bauldia sp.	0.00689085
Blautia sp.	0.0620176
Bradyrhizobium sp.	1.0543
Brevundimonas sp.	0.254961
Caldilinea sp.	0.00689085
Cetobacterium somerae	0.00689085
Chryseolinea sp.	0.0137817
Coprococcus sp.	0.00689085
Corynebacterium stationis	0.00689085
Defluviicoccus sp.	0.089581
Defluviimonas sp.	0.0413451
Devosia sp.	0.110254
Entotheonella sp.	0.00689085
Escherichia sp.	0.413451
Fictibacillus barbaricus	0.137817
Flavisolibacter sp.	0.00689085
Gaiella sp.	1.10254
Gemmata sp.	0.0689085
Gemmatimonas sp.	0.0964719
Georgenia muralis	0.00689085
Haliea sp.	0.00689085
Halocella sp.	0.00689085
Hyphomicrobium sp.	0.778666
Iamia sp.	8.31725
Kibdelosporangium aridum	0.434123
Kocuria carniphila	0.0137817
Kribbella sp.	1.83986
Lactobacillus brevis	0.00689085
Lactobacillus sp.	0.0137817
Limnobacter sp.	0.0137817
Mariprofundus sp.	0.0689085
Marmoricola sp.	0.00689085
Massilia haematophila	0.151599
Massilia sp.	0.985391
Mesorhizobium sp.	0.192944
Mesorhizobium tianshanense	0.0344542
Methylobacterium sp.	0.00689085
Methylocella silvestris	0.0137817
Microbacterium oxydans	0.0137817
Microthrix sp.	0.0206725
Mycoplasma sualvi	0.0137817
Nitrosococcus sp.	0.0275634
Nitrososphaera sp.	0.0137817
Nitrospira sp.	0.792448
Nocardioides furvisabuli	1.36439
Nocardioides sp.	0.0482359
Noviherbaspirillum sp.	2.01213
Odoribacter sp.	0.0137817
Oenococcus oeni	0.0206725
Ornatilinea sp.	1.578
Paracoccus carotinifaciens	0.365215
Paraprevotella sp.	0.00689085
Parvularcula sp.	0.0137817
Patulibacter sp.	0.124035
Paucisalibacillus sp.	0.00689085
Pedomicrobium sp.	0.234289
Phenylobacterium sp.	0.0206725
Planctomyces sp.	0.0137817
Pseudomonas aeruginosa	0.847574
Pseudoxanthomonas dokdonensis	0.00689085
Reyranella sp.	0.254961
Rhodobium sp.	0.0620176
Rhodopila globiformis	0.00689085
Rhodoplanes sp.	0.0482359
Rikenella sp.	0.00689085
Roseomonas frigidaquae	0.0413451
Roseomonas sp.	0.0964719
Rubellimicrobium sp.	0.00689085
Ruminococcus sp.	0.00689085
Singulisphaera sp.	0.00689085
Solirubrobacter sp.	0.0826902
Sphingomonas sp.	0.103363
Sphingopyxis alaskensis	0.668412
Staphylococcus aureus	0.0551268
Stenotrophomonas geniculata	0.192944
Steroidobacter sp.	15.3046
Streptococcus infantis	0.0482359
Tepidimicrobium sp.	0.213616
Truepera sp.	0.0620176
Mycobacterium leprae	0.005
Mycobacterium gilvum	0.011
Clostridium bifermentans	0.405

## Sheet: AR5001b
Species	HRTS1310.2
Achromobacter sp.	0.0193087
Acidiferrobacter sp.	0.141597
Acidovorax sp.	0.148034
Acinetobacter johnsonii	0.025745
Actinomyces naeslundii	0.0193087
Actinomyces sp.	4.0484
Actinophytocola sp.	3.26961
Actinoplanes subtropicus	0.0579262
Adhaeribacter sp.	0.025745
Afifella sp.	0.00643625
Agrobacterium tumefaciens	0.0450537
Akkermansia muciniphila	0.00643625
Algoriphagus sp.	0.0193087
Aliihoeflea aestuarii	0.05149
Alistipes sp.	0.00643625
Altererythrobacter sp.	0.0128725
Alysiosphaera sp.	0.0836712
Anaerosalibacter sp.	0.405484
Anaerovorax sp.	1.39667
Arthrobacter cereus	0.753041
Arthrobacter sp.	0.05149
Asticcacaulis sp.	0.315376
Azospira sp.	0.41192
Bacillus sp.	0.0321812
Bacteroides ovatus	0.0193087
Bauldia sp.	0.901075
Blastocatella sp.	0.00643625
Blastopirellula sp.	0.0321812
Blautia sp.	0.00643625
Bradyrhizobium sp.	0.881766
Brevundimonas sp.	0.0707987
Burkholderia bryophila	0.0128725
Byssovorax sp.	0.00643625
Bythopirellula goksoyri	0.00643625
Caenimonas sp.	0.0386175
Catelliglobosispora sp.	0.0193087
Caulobacter henricii	0.00643625
Chlorochromatium sp.	0.0128725
Chryseolinea sp.	2.78046
Comamonas sp.	0.00643625
Corynebacterium sp.	0.0128725
Corynebacterium stationis	0.0321812
Defluviicoccus sp.	1.15852
Defluviimonas sp.	0.0321812
Desulfobulbus sp.	0.0450537
Desulfovibrio sp.	0.218832
Devosia sp.	2.00811
Dyadobacter sp.	0.00643625
Enhydrobacter vulgaris	0.05149
Entotheonella sp.	0.186651
Escherichia sp.	0.392611
Exiguobacterium profundum	0.0128725
Fretibacterium sp.	2.11753
Gaiella sp.	0.231705
Gemella sp.	0.0128725
Gemmata sp.	0.0707987
Gemmatimonas sp.	0.302504
Haliangium sp.	0.0386175
Hirschia sp.	0.00643625
Hydrogenophilus hirschii	0.0707987
Hydrotalea sp.	0.0643625
Hyphomicrobium sp.	0.122289
Iamia sp.	0.379739
Ilumatobacter sp.	0.00643625
Johnsonella sp.	0.0836712
Kribbella sp.	0.418356
Leptospirillum sp.	0.0128725
Limnobacter thiooxidans	0.077235
Lysobacter koreensis	0.218832
Lysobacter sp.	0.00643625
Magnetospira sp.	0.0193087
Maribacter sp.	0.00643625
Mariprofundus sp.	0.5149
Massilia haematophila	0.00643625
Massilia sp.	0.0707987
Meganema sp.	0.00643625
Methanobrevibacter sp.	1.2422
Methylobacterium sp.	0.0193087
Methylorosula sp.	0.0128725
Micrococcus luteus	0.0707987
Neisseria elongata	0.0128725
Nitrosoarchaeum sp.	0.0450537
Nitrosococcus sp.	2.70966
Nitrosomonas sp.	0.00643625
Nitrosopumilus sp.	33.5457
Nitrososphaera gargensis	1.48034
Nitrososphaera sp.	9.58357
Nitrospira sp.	1.42241
Nocardioides albus	0.0836712
Nocardioides furvisabuli	0.36043
Nocardioides humi	0.0128725
Nocardioides sp.	0.025745
Noviherbaspirillum sp.	0.109416
Novosphingobium sp.	0.0386175
Oenococcus oeni	0.0193087
Ohtaekwangia sp.	0.746605
Olsenella uli	0.0128725
Ornatilinea sp.	1.55114
Ornithinimicrobium pekingense	0.00643625
Panacagrimonas sp.	0.00643625
Parvimonas sp.	4.73064
Parvularcula sp.	0.0707987
Patulibacter sp.	0.077235
Pedomicrobium sp.	0.212396
Pedosphaera parvula	0.0128725
Pelagibius sp.	1.42241
Pelospora genomosp.	0.025745
Phenylobacterium sp.	0.263886
Phycisphaera sp.	0.218832
Pirellula sp.	0.00643625
Planctomyces sp.	0.135161
Prosthecobacter sp.	0.0193087
Pseudoclavibacter sp.	0.0193087
Pseudolabrys sp.	0.122289
Pseudomonas aeruginosa	0.10298
Pseudomonas chroococcum	0.00643625
Pseudomonas fragi	0.00643625
Pseudomonas sp.	0.0128725
Pseudoramibacter alactolyticus	0.353994
Pseudoruegeria sp.	0.366866
Reyranella sp.	0.0128725
Rhizobium etli	0.0193087
Rhizomicrobium sp.	0.077235
Rhodomicrobium sp.	1.86008
Rhodopirellula sp.	0.173779
Rubrobacter sp.	0.0193087
Sandaracinus sp.	0.0193087
Schlegelella sp.	0.0386175
Schwartzia sp.	0.0128725
Sediminibacterium pinitorqua	0.0321812
Selenomonas sp.	0.366866
Solibacter sp.	0.025745
Solirubrobacter sp.	0.025745
Sphingopyxis alaskensis	0.0901075
Sphingopyxis sp.	0.0386175
Staphylococcus aureus	0.0321812
Stenotrophomonas geniculata	0.0193087
Steroidobacter sp.	9.339
Streptococcus infantis	0.0450537
Streptomyces sp.	0.0128725
Streptosporangium roseum	0.0193087
Thalassobaculum sp.	0.25745
Treponema lecithinolyticum	0.0450537
Treponema socranskii	0.0128725
Variovorax sp.	0.907511
Mycobacterium leprae	0.033
Mycobacterium gilvum	0.148
Treponema sp.	0.328
Leptospira interrogans	0.049

## Sheet: AR5002b
Species	HRTS1310.3
Acetobacter indonesiensis	0.018849
Achromobacter sp.	0.713119
Acidicaldus sp.	0.14765
Acidiphilium sp.	0.323574
Aciditerrimonas sp.	0.0376979
Acidobacterium sp.	0.144509
Acidocella sp.	0.0157075
Acidothermus sp.	0.0502639
Acidovorax sp.	0.201056
Acinetobacter johnsonii	0.128801
Actinocatenispora rupis	0.00314149
Actinocorallia longicatena	0.00314149
Actinocorallia sp.	0.0408394
Actinomadura bangladeshensis	0.0565469
Actinomyces odontolyticus	0.00314149
Actinomycetospora sp.	0.285876
Actinoplanes sp.	0.23247
Actinoplanes subtropicus	0.0816788
Actinospica sp.	0.153933
Actinosynnema mirum	0.00628299
Adhaeribacter aerolatus	0.138226
Adhaeribacter sp.	0.138226
Aeribacillus barengoltzii	0.00314149
Aeromicrobium sp.	0.0376979
Aeromonas caviae	0.00314149
Afifella sp.	0.0534054
Afipia sp.	0.0251319
Agaricicola sp.	0.00314149
Agrobacterium sp.	0.166499
Agromyces allii	0.0314149
Agromyces bauzanensis	0.0408394
Alicyclobacillus sp.	0.0157075
Allokutzneria multivorans	0.00628299
Altererythrobacter sp.	0.226187
Alysiosphaera sp.	0.172782
Amaricoccus sp.	0.00628299
Ammoniphilus sp.	0.00942448
Amnibacterium sp.	0.18849
Amycolatopsis coloradensis	0.304725
Amycolatopsis pigmentata	0.00314149
Amycolatopsis sp.	0.0219904
Anaerobranca sp.	0.00628299
Anaerococcus sp.	0.0219904
Anaerolinea sp.	0.0219904
Anaeromyxobacter sp.	0.223046
Ancylobacter sp.	0.00314149
Aneurinibacillus sp.	0.00628299
Angustibacter sp.	0.0628299
Aquabacterium sp.	0.166499
Aquicella sp.	0.116235
Arcanobacterium sp.	0.00628299
Arcticibacter sp.	0.0314149
Arenimonas sp.	0.141367
Armatimonas rosea	0.00314149
Armatimonas sp.	0.0157075
Arthrobacter arilaitensis	0.018849
Arthrobacter cereus	1.91317
Arthrobacter nitroguajacolicus	0.27331
Arthrobacter sp.	0.0345564
Arthrospira sp.	0.012566
Asaia sp.	0.00942448
Asteroleplasma sp.	0.0439809
Asticcacaulis biprosthecium	0.018849
Azospira sp.	1.78751
Bacillus alkalitelluris	0.00314149
Bacillus aryabhattai	0.0408394
Bacillus foraminis	0.012566
Bacillus lentus	0.00314149
Bacillus sp.	0.515205
Bacillus thermolactis	0.00942448
Balneimonas sp.	0.320432
Bauldia sp.	0.0565469
Bdellovibrio sp.	0.144509
Belnapia sp.	0.0691128
Bifidobacterium adolescentis	0.00314149
Blastocatella sp.	3.33627
Blastochloris sp.	0.0973863
Blastococcus aggregatus	0.0282734
Blastococcus sp.	0.980146
Blastomonas sp.	0.0219904
Blastopirellula sp.	0.00628299
Blautia obeum	0.00314149
Blautia sp.	0.018849
Bosea eneae	0.0439809
Bosea sp.	0.596884
Bradyrhizobium sp.	0.703694
Brevundimonas intermedia	0.0157075
Brevundimonas sp.	0.00942448
Bryobacter sp.	1.63986
Burkholderia bryophila	0.408394
Burkholderia kururiensis	0.00942448
Burkholderia sp.	0.464941
Byssovorax sp.	0.0942448
Caenimonas sp.	0.728826
Caldalkalibacillus sp.	0.00314149
Caldicoprobacter sp.	0.018849
Caldilinea sp.	0.14765
Calditerricola sp.	0.00314149
Caloramator sp.	0.012566
Captivus sp.	0.00314149
Carnobacterium sp.	0.00628299
Catellatospora citrea	0.235612
Catellatospora sp.	0.00628299
Caulobacter henricii	0.103669
Caulobacter sp.	0.018849
Cellulomonas xylanilytica	0.116235
Cellvibrio sp.	0.116235
Cenarchaeum symbiosum	0.0157075
Chitinophaga oryziterrae	0.0282734
Chitinophaga sp.	0.116235
Chlorochromatium sp.	0.00314149
Chloroflexus sp.	0.0345564
Chryseobacterium indologenes	0.018849
Chryseobacterium sp.	0.00314149
Chryseolinea sp.	0.342423
Chthoniobacter sp.	1.19063
Chthonomonas sp.	0.245036
Clostridium bowmanii	0.0251319
Clostridium hiranonis	0.00314149
Clostridium sp.	0.0691128
Cohnella arctica	0.0282734
Conexibacter sp.	0.785373
Constrictibacter sp.	0.012566
Coprococcus sp.	0.00628299
Coprothermobacter sp.	0.342423
Corallococcus coralloides	0.0219904
Corynebacterium sp.	0.00628299
Coxiella sp.	0.00942448
Crossiella sp.	0.578035
Cryptosporangium sp.	0.0471224
Cytophaga hutchinsonii	0.00628299
Dactylosporangium matsuzakiense	0.0157075
Defluviicoccus sp.	0.00628299
Defluviimonas sp.	0.00314149
Deinococcus aquatilis	0.00314149
Deinococcus radiomollis	0.0502639
Deinococcus yunweiensis	0.00314149
Demequina sp.	0.00314149
Desertibacter sp.	0.00942448
Desulfosporosinus meridiei	0.0157075
Desulfotomaculum intricatum	0.00628299
Desulfotomaculum peckii	0.012566
Dethiobacter sp.	0.00314149
Devosia insulae	0.204197
Devosia sp.	0.0659713
Dokdonella sp.	0.201056
Dongia sp.	0.113094
Dyadobacter sp.	0.122518
Dyella sp.	0.160216
Edaphobacter modestum	0.119377
Elstera sp.	0.0345564
Enhydrobacter vulgaris	0.00942448
Ensifer adhaerens	0.00628299
Enterobacter sp.	0.00314149
Entotheonella sp.	0.00314149
Erythrobacter sp.	0.0596884
Escherichia sp.	2.07653
Euzebya sp.	0.018849
Ferruginibacter sp.	1.13722
Fibrella sp.	0.00314149
Filimonas sp.	0.119377
Filomicrobium sp.	0.00314149
Fimbriimonas sp.	0.0345564
Finegoldia sp.	0.0314149
Flavihumibacter sp.	0.00628299
Flavisolibacter ginsengisoli	0.116235
Flavisolibacter sp.	2.44094
Flavobacterium caeni	0.00628299
Flavobacterium hercynium	0.00628299
Flavobacterium myungsuense	0.00942448
Flavobacterium sp.	0.204197
Fluviicola sp.	0.00942448
Fodinicola sp.	0.012566
Friedmanniella sp.	0.0376979
Frigoribacterium sp.	0.0157075
Gaiella sp.	0.823071
Gallicola sp.	0.012566
Geminicoccus sp.	0.0439809
Gemmata sp.	3.86718
Gemmatimonas sp.	3.73209
Gemmobacter sp.	0.00314149
Geobacillus sp.	0.0314149
Geobacillus stearothermophilus	0.0251319
Geobacter humireducens	0.018849
Geobacter sp.	0.0251319
Geodermatophilus ruber	0.0282734
Geodermatophilus sp.	0.785373
Granulicella sp.	0.229329
Haliangium sp.	0.653431
Haliea sp.	0.00314149
Haloferula sp.	0.00942448
Haloplasma sp.	0.00942448
Hamadaea yuxiensis	0.0282734
Herminiimonas fonticola	0.998995
Herpetosiphon sp.	0.0219904
Hirschia sp.	0.00942448
Hyalangium sp.	0.018849
Hydrogenophaga pseudoflava	0.012566
Hymenobacter algoricola	0.0408394
Hymenobacter ocellatus	0.00628299
Hymenobacter sp.	0.603167
Hyphomicrobium sp.	0.119377
Iamia sp.	0.163358
Ilumatobacter sp.	0.0219904
Inquilinus sp.	0.0534054
Isosphaera sp.	0.936165
Janthinobacterium lividum	0.0848203
Janthinobacterium sp.	0.914174
Janthinobacterium zoogloeoides	0.14765
Jatrophihabitans sp.	0.270168
Kaistia sp.	0.00314149
Kaistobacter sp.	9.35851
Kineococcus radiotolerans	0.0345564
Kineosporia sp.	0.216763
Koribacter sp.	1.2189
Kouleothrix sp.	0.00314149
Kribbella sp.	0.141367
Kroppenstedtia eburnea	0.00314149
Ktedonobacter racemifer	0.0157075
Ktedonobacter sp.	0.936165
Labrys sp.	0.219904
Lacibacter sp.	0.00942448
Lactobacillus casei	0.00314149
Lactococcus lactis	0.012566
Lautropia sp.	0.00314149
Legionella sp.	0.285876
Leifsonia xyli	0.18849
Lentzea albidocapillata	0.00628299
Leptospirillum sp.	0.0691128
Leptothrix sp.	0.018849
Leptotrichia shahii	0.00628299
Limnobacter sp.	0.0219904
Litorilinea sp.	0.00314149
Longispora sp.	0.00314149
Luteolibacter sp.	0.0345564
Lysinibacillus sp.	0.0408394
Lysobacter sp.	0.00942448
Lysobacter xinjiangensis	0.018849
Marmoricola sp.	1.00528
Massilia sp.	0.42096
Melittangium lichenicola	0.00314149
Mesorhizobium ciceri	0.14765
Mesorhizobium sp.	0.0502639
Mesorhizobium tianshanense	0.116235
Metachlamydia lacustris	0.00314149
Methanobrevibacter sp.	0.0345564
Methylacidiphilum sp.	0.00942448
Methylobacillus flagellatus	0.00628299
Methylobacillus sp.	0.00942448
Methylobacterium adhaesivum	0.0628299
Methylobacterium aquaticum	0.018849
Methylobacterium extorquens	0.0345564
Methylobacterium sp.	0.948731
Methylocaldum sp.	0.00314149
Methylocella silvestris	0.00628299
Methylocella sp.	0.157075
Methylorosula sp.	0.282734
Methylotenera sp.	0.219904
Methylovirgula sp.	0.00314149
Microbispora sp.	0.00628299
Micrococcus luteus	0.00314149
Microlunatus sp.	0.00942448
Microthrix sp.	0.163358
Microvirga sp.	0.012566
Millisia sp.	0.00314149
Motilibacter rhizosphaerae	0.0785373
Mucilaginibacter sp.	0.160216
Mycobacterium celatum	0.0565469
Mycobacterium sp.	0.0219904
Mycoplana sp.	0.00314149
Myxococcus sp.	0.0157075
Nakamurella multipartita	0.00628299
Nakamurella sp.	0.131943
Nannocystis exedens	0.00314149
Nannocystis sp.	0.0816788
Niastella sp.	0.135084
Nitrolancea sp.	0.0628299
Nitrosococcus sp.	0.461799
Nitrosomonas sp.	0.012566
Nitrososphaera gargensis	0.00942448
Nitrososphaera sp.	5.91229
Nitrospira defluvii	0.00314149
Nitrospira sp.	0.0408394
Nocardia rhamnosiphila	0.00314149
Nocardia sp.	0.0157075
Nocardioides humi	0.0471224
Nocardioides sp.	2.08281
Nordella sp.	0.018849
Nostoc sp.	0.00628299
Nostocoida acidiphila	0.00314149
Nostocoida limicola	0.018849
Nostocoida sp.	0.0596884
Novosphingobium sp.	1.46394
Oceanobacillus sp.	0.00942448
Odyssella sp.	0.00314149
Oenococcus oeni	0.0502639
Ohtaekwangia sp.	0.235612
Opitutus sp.	0.106811
Ornithinicoccus sp.	0.012566
Oryzihumus leptocrescens	0.175924
Paenibacillus aestivum	0.00628299
Paenibacillus edaphicus	0.00628299
Paenibacillus pectinilyticus	0.0345564
Paenibacillus senegalensis	0.00314149
Paenibacillus sp.	0.12566
Paenibacillus taihuensis	0.018849
Panacagrimonas sp.	0.012566
Pantoea sp.	0.0596884
Parasegetibacter luojiensis	0.00314149
Parasegetibacter sp.	0.301583
Pasteuria sp.	0.00314149
Patulibacter sp.	0.889042
Paucimonas sp.	0.012566
Pedobacter roseus	0.0565469
Pedobacter sp.	0.14765
Pedomicrobium sp.	0.0722543
Pedosphaera parvula	0.144509
Pedosphaera sp.	0.672279
Pelosinus sp.	0.00628299
Peptoniphilus duerdenii	0.00942448
Peptoniphilus lacrimalis	0.00314149
Peptoniphilus sp.	0.018849
Peredibacter sp.	0.0628299
Perlucidibaca sp.	0.00628299
Phaselicystis flava	0.00628299
Phaselicystis sp.	0.0753958
Phenylobacterium sp.	0.590601
Phycicoccus sp.	0.0785373
Phycicola gilvus	0.0816788
Phycisphaera sp.	0.948731
Pirellula sp.	0.235612
Planctomyces sp.	0.659713
Planifilum sp.	0.0502639
Polaromonas sp.	0.018849
Porphyromonas sp.	0.0376979
Prevotella buccalis	0.00942448
Prevotella copri	0.00314149
Prevotella sp.	0.0314149
Promicromonospora sukumoe	0.00314149
Propionibacterium acnes	0.00628299
Prosthecobacter sp.	0.0565469
Pseudoclavibacter sp.	0.018849
Pseudolabrys sp.	0.012566
Pseudomonas aeruginosa	0.018849
Pseudomonas azotoformans	0.0408394
Pseudomonas chroococcum	0.00314149
Pseudomonas fluorescens	0.0157075
Pseudomonas graminis	0.172782
Pseudomonas sp.	0.175924
Pseudonocardia halophobica	0.556044
Pseudonocardia sp.	0.0565469
Pseudospirillum sp.	0.012566
Pseudoxanthomonas mexicana	0.00628299
Rahnella carotovorum	0.00942448
Reyranella sp.	0.21048
Rhabdochlamydia sp.	0.00314149
Rhizobium etli	0.00314149
Rhizomicrobium sp.	0.439809
Rhodanobacter sp.	0.012566
Rhodobacter sp.	0.00314149
Rhodococcus corynebacterioides	0.00628299
Rhodococcus equi	0.00628299
Rhodococcus erythropolis	0.0376979
Rhodococcus fascians	0.00628299
Rhodocytophaga aerolata	0.0659713
Rhodocytophaga sp.	0.018849
Rhodopila globiformis	0.153933
Rhodopila sp.	0.0691128
Rhodopirellula sp.	0.00942448
Rhodoplanes sp.	0.7571
Rhodovarius sp.	0.00628299
Roseiflexus sp.	0.578035
Roseimicrobium sp.	0.00628299
Roseomonas aerilata	0.00628299
Roseomonas ludipueritiae	0.018849
Roseomonas sp.	0.163358
Rubellimicrobium roseum	0.0251319
Rubellimicrobium sp.	0.153933
Rubricoccus sp.	0.00314149
Rubrivivax gelatinosus	0.00628299
Rubrobacter sp.	0.0565469
Rugosimonospora acidiphila	0.012566
Ruminococcus sp.	0.00314149
Saccharimonas sp.	0.0722543
Saccharopolyspora sp.	0.012566
Saccharothrix sp.	0.00314149
Sandaracinus sp.	0.150792
Sandarakinorhabdus sp.	0.00314149
Sediminibacterium salmoneum	0.012566
Sediminibacterium sp.	0.00942448
Segetibacter koreensis	0.2953
Segetibacter sp.	1.81264
Shimazuella sp.	0.0345564
Simiduia sp.	0.00628299
Singulisphaera limicola	0.00628299
Singulisphaera sp.	4.67768
Siphonobacter sp.	0.0345564
Skermanella sp.	0.267027
Smithella sp.	0.00314149
Solibacter sp.	1.16235
Solirubrobacter sp.	3.00955
Sorangium sp.	0.182207
Sphaerobacter sp.	0.0251319
Sphingobium sp.	0.0219904
Sphingomonas asaccharolytica	0.0691128
Sphingomonas dokdonensis	0.0251319
Sphingomonas echinoides	0.012566
Sphingomonas sp.	0.63144
Sphingomonas wittichii	0.0251319
Sphingopyxis alaskensis	0.00628299
Spirosoma rigui	0.00314149
Spirosoma sp.	0.0942448
Sporocytophaga sp.	0.0219904
Stackebrandtia sp.	0.00628299
Stenotrophomonas maltophilia	0.276451
Stenotrophomonas panacihumi	0.0314149
Steroidobacter sp.	0.0785373
Streptococcus salivarius	0.0157075
Streptomyces serianimatus	0.00628299
Streptomyces sp.	0.018849
Symbiobacterium sp.	0.00942448
Taibaiella sp.	0.0408394
Telmatobacter sp.	0.468082
Tepidanaerobacter sp.	0.00942448
Tepidimicrobium sp.	0.0219904
Terrabacter sp.	0.153933
Terrimonas sp.	0.0314149
Tetrasphaera sp.	0.00314149
Thermoactinomyces sp.	0.0157075
Thermobacillus composti	0.012566
Thermobacillus sp.	0.00628299
Thermobispora bispora	0.00942448
Thermomonas sp.	0.00314149
Thermopolyspora sp.	0.00942448
Thermosporothrix sp.	0.018849
Truepera sp.	0.00314149
Tumebacillus permanentifrigoris	0.00942448
Tumebacillus sp.	0.0565469
Turicibacter sp.	0.00628299
Uliginosibacterium sp.	0.0314149
Undibacterium sp.	0.00314149
Undibacterium terreum	0.00314149
Varibaculum sp.	0.0157075
Variovorax paradoxus	0.175924
Variovorax sp.	0.0408394
Verrucomicrobium sp.	0.0345564
Verrucomicrobium spinosum	0.012566
Williamsia faeni	0.00628299
Woodsholea sp.	0.00942448
Xanthomonas sp.	0.0251319
Xiphinematobacter sp.	1.40111
Mycobacterium leprae	0.043
Mycobacterium gilvum	0.29
Trichomonas vaginalis	1.449
Staphylococcus aureus	0.007
Leptospira interrogans	0.58
