# Supplementary material for: Metagenomic Research of Infectious Diseases in Archaeological Contexts: Evidence from the Hospital Real de Todos-os-Santos (Portugal)
Source: MDPI journal article supplement (doi:10.3390/app12126096), 2022-06-15
Supplement: s1 [file s1 › Suplementary Figures.pdf]

Sequences producing significant alignments:

Select: [All](#) [None](#) Selected:0

Alignments 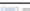 Download 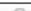 GenBank 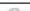 Graphics 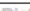 Distance tree of results 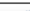

|                          | Description                                                                                                    | Max score | Total score | Query cover | E value | Ident | Accession                   |
|--------------------------|----------------------------------------------------------------------------------------------------------------|-----------|-------------|-------------|---------|-------|-----------------------------|
| <input type="checkbox"/> | <a href="#">Treponema socranskii strain D56BR116 16S ribosomal RNA gene, partial sequence</a>                  | 468       | 468         | 100%        | 7e-132  | 100%  | <a href="#">NR_028690.1</a> |
| <input type="checkbox"/> | <a href="#">Treponema socranskii subsp. paredis strain ATCC 35535 16S ribosomal RNA gene, partial sequence</a> | 462       | 462         | 100%        | 3e-130  | 99%   | <a href="#">NR_024869.1</a> |
| <input type="checkbox"/> | <a href="#">Treponema socranskii subsp. buccale strain ATCC 35534 16S ribosomal RNA gene, partial sequence</a> | 462       | 462         | 100%        | 3e-130  | 99%   | <a href="#">NR_024868.1</a> |
| <input type="checkbox"/> | <a href="#">Treponema parvum ATCC 700770 strain OMZ 833 16S ribosomal RNA gene, partial sequence</a>           | 279       | 279         | 100%        | 3e-75   | 87%   | <a href="#">NR_025131.1</a> |
| <input type="checkbox"/> | <a href="#">Treponema porcinum strain 14V28 16S ribosomal RNA gene, partial sequence</a>                       | 274       | 274         | 100%        | 2e-73   | 86%   | <a href="#">NR_042942.1</a> |
| <input type="checkbox"/> | <a href="#">Treponema amylovorum strain HA2P 16S ribosomal RNA gene, partial sequence</a>                      | 268       | 268         | 100%        | 7e-72   | 86%   | <a href="#">NR_026377.1</a> |
| <input type="checkbox"/> | <a href="#">Treponema bryantii strain RUS-1 16S ribosomal RNA gene, partial sequence</a>                       | 252       | 252         | 100%        | 7e-67   | 85%   | <a href="#">NR_104781.1</a> |
| <input type="checkbox"/> | <a href="#">Treponema maltophilum strain BR 16S ribosomal RNA gene, partial sequence</a>                       | 252       | 252         | 100%        | 7e-67   | 85%   | <a href="#">NR_029296.1</a> |
| <input type="checkbox"/> | <a href="#">Treponema brennaborensis strain DD5/3 16S ribosomal RNA, partial sequence</a>                      | 246       | 246         | 100%        | 3e-65   | 84%   | <a href="#">NR_074742.1</a> |
| <input type="checkbox"/> | <a href="#">Treponema brennaborensis strain DD5/3 16S ribosomal RNA gene, partial sequence</a>                 | 243       | 243         | 100%        | 5e-64   | 84%   | <a href="#">NR_029348.1</a> |
| <input type="checkbox"/> | <a href="#">Treponema bryantii strain RUS-1 16S ribosomal RNA, partial sequence</a>                            | 243       | 243         | 100%        | 5e-64   | 84%   | <a href="#">NR_118718.1</a> |

Supplementary Figure S1. BLAST search of *T. socranskii* sequence.

Sequences producing significant alignments:

Select: [All](#) [None](#) Selected:0

| Alignments <a href="#">Download</a> <a href="#">GenBank</a> <a href="#">Graphics</a> <a href="#">Distance tree of results</a> |                                                                                                      |           |             |             |         |       |                             |
|-------------------------------------------------------------------------------------------------------------------------------|------------------------------------------------------------------------------------------------------|-----------|-------------|-------------|---------|-------|-----------------------------|
|                                                                                                                               | Description                                                                                          | Max score | Total score | Query cover | E value | Ident | Accession                   |
| <input type="checkbox"/>                                                                                                      | <a href="#">Treponema lecithinolyticum strain OMZ 684 16S ribosomal RNA gene, partial sequence</a>   | 468       | 468         | 100%        | 7e-132  | 100%  | <a href="#">NR_026247.1</a> |
| <input type="checkbox"/>                                                                                                      | <a href="#">Treponema maltophilum strain BR 16S ribosomal RNA gene, partial sequence</a>             | 418       | 418         | 100%        | 7e-117  | 96%   | <a href="#">NR_029296.1</a> |
| <input type="checkbox"/>                                                                                                      | <a href="#">Treponema parvum ATCC 700770 strain OMZ 833 16S ribosomal RNA gene, partial sequence</a> | 291       | 291         | 100%        | 2e-78   | 87%   | <a href="#">NR_025131.1</a> |
| <input type="checkbox"/>                                                                                                      | <a href="#">Treponema brennaborensis strain DD5/3 16S ribosomal RNA gene, partial sequence</a>       | 287       | 287         | 100%        | 2e-77   | 87%   | <a href="#">NR_029348.1</a> |
| <input type="checkbox"/>                                                                                                      | <a href="#">Treponema brennaborensis strain DD5/3 16S ribosomal RNA, partial sequence</a>            | 285       | 285         | 100%        | 7e-77   | 87%   | <a href="#">NR_074742.1</a> |
| <input type="checkbox"/>                                                                                                      | <a href="#">Treponema porcinum strain 14V28 16S ribosomal RNA gene, partial sequence</a>             | 279       | 279         | 100%        | 3e-75   | 87%   | <a href="#">NR_042942.1</a> |
| <input type="checkbox"/>                                                                                                      | <a href="#">Treponema zuelzeri strain DSM 1903 16S ribosomal RNA gene, partial sequence</a>          | 268       | 268         | 100%        | 7e-72   | 86%   | <a href="#">NR_104797.1</a> |
| <input type="checkbox"/>                                                                                                      | <a href="#">Treponema bryantii strain RUS-1 16S ribosomal RNA gene, partial sequence</a>             | 257       | 257         | 100%        | 2e-68   | 85%   | <a href="#">NR_104781.1</a> |
| <input type="checkbox"/>                                                                                                      | <a href="#">Spirochaeta isovalerica strain DSM 2461 16S ribosomal RNA gene, partial sequence</a>     | 252       | 252         | 100%        | 7e-67   | 85%   | <a href="#">NR_117137.1</a> |
| <input type="checkbox"/>                                                                                                      | <a href="#">Spirochaeta isovalerica strain MA-2 16S ribosomal RNA gene, partial sequence</a>         | 252       | 252         | 100%        | 7e-67   | 85%   | <a href="#">NR_104798.1</a> |
| <input type="checkbox"/>                                                                                                      | <a href="#">Treponema medium strain G7201 16S ribosomal RNA gene, partial sequence</a>               | 252       | 252         | 100%        | 7e-67   | 85%   | <a href="#">NR_037137.1</a> |
| <input type="checkbox"/>                                                                                                      | <a href="#">Spirochaeta psychrophila strain MO-SPC1 16S ribosomal RNA, partial sequence</a>          | 246       | 246         | 100%        | 3e-65   | 84%   | <a href="#">NR_134185.1</a> |
| <input type="checkbox"/>                                                                                                      | <a href="#">Treponema amylovorum strain HA2P 16S ribosomal RNA gene, partial sequence</a>            | 241       | 241         | 100%        | 2e-63   | 84%   | <a href="#">NR_026377.1</a> |
| <input type="checkbox"/>                                                                                                      | <a href="#">Spirochaeta alkalica strain Z-7491 16S ribosomal RNA gene, partial sequence</a>          | 241       | 241         | 100%        | 2e-63   | 84%   | <a href="#">NR_026301.1</a> |

Supplementary Figure S2. BLAST search of *T. lecithinolyticum* sequence.

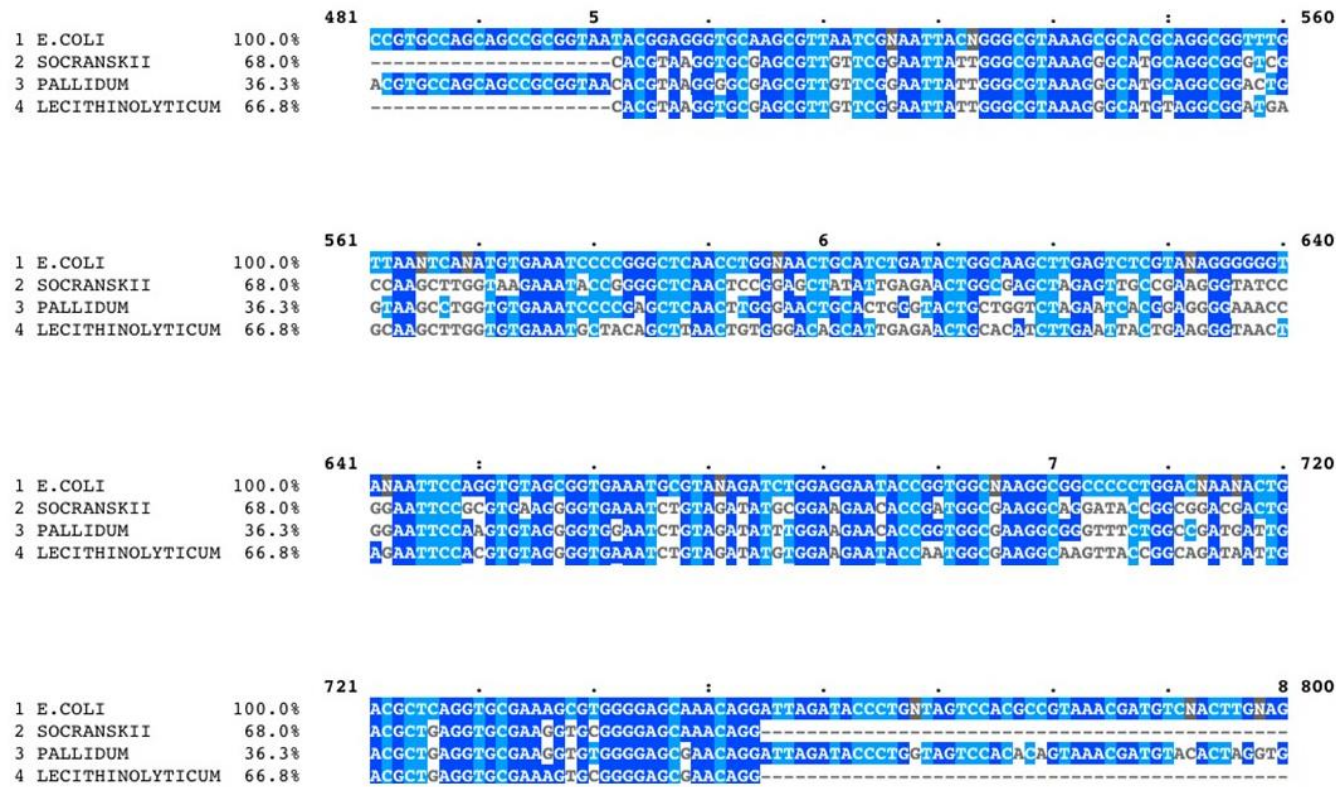

Supplementary Figure S3. CLUSTAL sequences alignment.
